# Supplementary material
Source: PubMed Central journal article supplement (PMC5045792)
Supplement: NIHMS802665-supplement.pdf [file NIHMS802665-supplement.pdf]

SUPPLEMENTARY INFORMATION

Screening for transmembrane association in divisome proteins using  
TOXGREEN, a high-throughput variant of the TOXCAT assay

Claire R. Armstrong and Alessandro Senes

Dept of Biochemistry  
University of Wisconsin-Madison  
433 Babcock Dr.  
Madison WI 53706

senes@wisc.edu

**Table S1 Test constructs used in this study**

| <b>Name</b> | <b>Sequence</b>    |
|-------------|--------------------|
| GpA         | LIIFGVMAGVIGT      |
| GpA*        | LIIFGVMAIVIGT      |
| PXDC2       | LLLLLLLGLLLGILLVL  |
| F173B       | LLLLLLLFLLGLLLGTL  |
| ANPRC       | LLLLLLLSALLGILLGAL |
| EPHB6       | LLLLLLLSLLGSLLGAL  |
| MUC13       | LLLFQLLLTLLGTLLGIL |
| TNR1B       | LLLTGLLALLGLLLGVL  |
| HFE         | LLLTLLLGVLLGILLFVL |
| SPTC3       | LLLFLLGYLLGTLLGYL  |
| STAB1       | LLLVLLLGALLGILLGAL |
| MUC15       | LLLGILLGALLGALLGVL |
| ADCK4       | LLLLLLLANLLGILLGLL |
| ACV1B       | LLLLLLLVELLGILLGAL |
| TNR12       | LLLALLTFLLGILLGFL  |
| STX17       | LLLAALLGLLGFLLGKL  |
| ROMO1       | LLLGFLGCLLGMLLGA   |
| VAS1        | LLFFLLGILLGILLSL   |

The inserts sequence were digested with NheI and DpnII and ligated into the compatible NheI-BamHI restriction sites of the pccKAN and pccGFpKAN, plasmids to produce the sequence "...NRAS-TM-ILIN..." The sequences are part of a library of previously studied TOXCAT constructs, which contain predicted helix-helix interfaces from human single-span transmembrane proteins [1], covering a range of CAT expression levels from approximately 25% to 175% relative to the CAT expression of the GpA standard.

**Table S2 Divisome sequences used in this study**

| Bacterial Species               | Uniprot code | TM Sequence             |
|---------------------------------|--------------|-------------------------|
| <b>FtsB</b>                     |              |                         |
| <i>Escherichia coli</i>         | P0A6S5       | LTLLLLLAILVWLQYSLWF     |
| <i>Yersinia pestis</i>          | Q1C479       | LTLLLLVLLGWLQYSLWL      |
| <i>Vibrio cholerae</i>          | Q9KUJ3       | FALTLSLLLWLLYTLMW       |
| <i>Haemophilus influenzae</i>   | P44035       | LILILLSVLLVLFQYNFWF     |
| <i>Legionella pneumophila</i>   | Q5WV01       | IFILILIVALVALQHKLWL     |
| <i>Neisseria meningitidis</i>   | P64161       | VTVVLSFALVCCQYSLWF      |
| <i>Caulobacter crescentus</i>   | Q9A7J8       | FLPTTAIFFLIFYFAFHAL     |
| <i>Rickettsia prowazekii</i>    | Q9ZDA9       | IILNIFLALLLVYFIFHCIIY   |
| <i>Bacillus subtilis</i>        | P37471       | LTVFGALVFLTAIVLASSV     |
| <i>Streptococcus pneumoniae</i> | Q8CZD2       | FMGGVLLIMLLFILPTFNLA    |
| <i>Streptococcus pyogenes</i>   | Q9A203       | FMGWLIVSMMFLFILPTYNLV   |
| <b>FtsQ</b>                     |              |                         |
| <i>Escherichia coli</i>         | P06136       | ILFLLTVLTTVLVSGWVVVG    |
| <i>Yersinia pestis</i>          | Q7CGB1       | VIFLLMVLGTILWGGWVVIW    |
| <i>Vibrio cholerae</i>          | Q9KPG9       | FFLVVLLIGLLYSTISMMW     |
| <i>Haemophilus influenzae</i>   | P45067       | FAVLGVFFLLGVYFNWQSIL    |
| <i>Legionella pneumophila</i>   | Q5ZSA8       | GLRYLTIMGLLILSALLLAGRLG |
| <i>Neisseria meningitidis</i>   | X5EU48       | WLLVMMAMLAASGLVWFY      |
| <i>Caulobacter crescentus</i>   | P0CAU8       | VALSVAGAALGLGLVVMLATG   |
| <i>Rickettsia prowazekii</i>    | Q9ZDS5       | ILVLKIVLMIFVCLFVFTKYF   |
| <i>Bacillus subtilis</i>        | P16655       | ISFIMLFFIMVLIIVYLQTP    |
| <i>Streptococcus pneumoniae</i> | Q97RU7       | FTILFPSSLLLFVSAAYLSP    |
| <i>Streptococcus pyogenes</i>   | Q1JG12       | LPVLLGALLMAVSIFMITPY    |
| <b>FtsI</b>                     |              |                         |
| <i>Escherichia coli</i>         | P0AD68       | FALLCGCILLALAFLLG       |
| <i>Yersinia pestis</i>          | A0A0E1NWU7   | FALLCGCILLALVGLIM       |
| <i>Vibrio cholerae</i>          | A0A085PFW1   | FYLLLFVLTAFALVA         |
| <i>Haemophilus influenzae</i>   | P45059       | YMLSTVLILLGLCALVA       |
| <i>Legionella pneumophila</i>   | A0A130BGB2   | LVTVAVFFSLILAVLIW       |
| <i>Neisseria meningitidis</i>   | E0N6Q4       | ISFVLMIAIVLFAGLIA       |
| <i>Caulobacter crescentus</i>   | B8H0A0       | LVMGFFGFCFVGVSLGAG      |
| <i>Rickettsia prowazekii</i>    |              |                         |
| <i>Bacillus subtilis</i>        | Q07868       | GAAILSICFALFFPVILG      |
| <i>Streptococcus pneumoniae</i> | Q75Y83       | LSLLSVFVFAIFLVNFAVIIG   |
| <i>Streptococcus pyogenes</i>   | Q1J5G0       | MMLLTIFIFFIFIINFMIIIG   |

| Bacterial Species               | Uniprot code | TM Sequence              |
|---------------------------------|--------------|--------------------------|
| <b>FtsL</b>                     |              |                          |
| <i>Escherichia coli</i>         | P0AEN6       | FGKLPCLCFICIIILTAVTVVTTA |
| <i>Yersinia pestis</i>          | Q7CGA7       | LILLVAVLISAVLVVTTA       |
| <i>Vibrio cholerae</i>          | Q9KPG0       | LLLLVLIIFSCAMGVVFM       |
| <i>Haemophilus influenzae</i>   | P45058       | LVVLLIGILVLSAMGTIWIIT    |
| <i>Legionella pneumophila</i>   | Q5WXZ3       | LYMLIVLLAAVLSAFAVIY      |
| <i>Neisseria meningitidis</i>   | Q7DDQ4       | FLLLLAVCVSAFVVM          |
| <i>Caulobacter crescentus</i>   | Q9RQJ5       | VVEVVGLCILLSLVTGVYLA     |
| <i>Rickettsia prowazekii</i>    | D5AXG5       | FHYLILFITIIAICSLF        |
| <i>Bacillus subtilis</i>        | Q07867       | VLLVLFVAAVLSVSLIIVS      |
| <i>Streptococcus pneumoniae</i> | Q8DR70       | FYFSIAVTTLIVAIISIFM      |
| <i>Streptococcus pyogenes</i>   | Q99YK0       | AFYTAIVTAITMAVSI IYL     |
| <b>ZipA/ErzA</b>                |              |                          |
| <i>Escherichia coli</i>         | P77173       | LILIIVGAIAI IALLVHGFWT   |
| <i>Yersinia pestis</i>          | P58492       | LILIIVGAIAI IALLHGLWT    |
| <i>Vibrio cholerae</i>          | Q9KTD2       | FVLIIVGALAI AALLFPHGLWT  |
| <i>Haemophilus influenzae</i>   | P44113       | TILIIIVGIVALVALIVHGLWS   |
| <i>Legionella pneumophila</i>   | Q5ZSA0       | SLIILVLLIGLIVLVAIGRLM    |
| <i>Neisseria meningitidis</i>   | A0A0H5QES0   | YIVFLAAVAVVAVNYM         |
| <i>Caulobacter crescentus</i>   |              |                          |
| <i>Rickettsia prowazekii</i>    |              |                          |
| <i>Bacillus subtilis</i>        | O34894       | FVIGLLIVLLALFAAGYFF      |
| <i>Streptococcus pneumoniae</i> | Q8DQE5       | LMVAIAVIVLVAIVVAIFL      |
| <i>Streptococcus pyogenes</i>   | P0DA99       | LIVAVLLVVI IAYLVGVII     |
| <b>FtsN</b>                     |              |                          |
| <i>Escherichia coli</i>         | P29131       | AMVAIAAVLVTFIGGL         |
| <i>Yersinia pestis</i>          | Q7CL21       | TVMALAVALLVVFVGGGL       |
| <i>Vibrio cholerae</i>          | A0A085TJQ3   | GLVAIVLLAVFGYGLYLL       |
| <i>Haemophilus influenzae</i>   | A0A0N1EX29   | VLIIFLALFIVLVFVVGLYLL    |
| <i>Legionella pneumophila</i>   | A0A0C9P799   | LVVIVTFVFGYITASFL        |
| <i>Neisseria meningitidis</i>   | X5F9A7       | GLSGFFGLILATVIIAGIL      |
| <i>Caulobacter crescentus</i>   | B8GX61       | LIISAIVLVTLVAVVMIL       |
| <i>Rickettsia prowazekii</i>    | Q9ZE80       | ICLVSLICISGIYFGYQYQ      |
| <i>Bacillus subtilis</i>        |              |                          |
| <i>Streptococcus pneumoniae</i> |              |                          |
| <i>Streptococcus pyogenes</i>   |              |                          |

The inserts sequence were digested with NheI and DpnII and ligated into the compatible NheI-BamHI restriction sites of the pccKAN and pccGFPKAN, plasmids to produce the sequence "...NRAS-TM-ILIN..." The bacterial sequences were selected as identified in the UniProt database [2] and their TM segments were selected as annotated in the TRANSMEM feature of their UniProt record.

### Log Phase cells in LB media

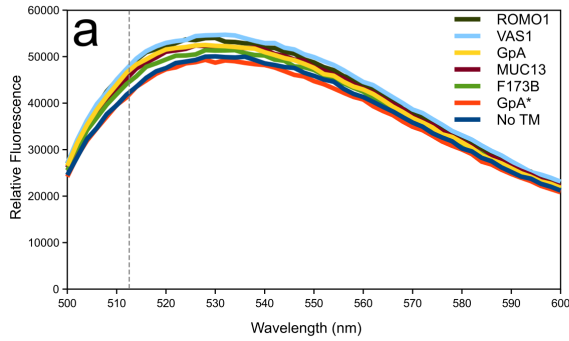

### Log Phase Cells Resuspended in PBS

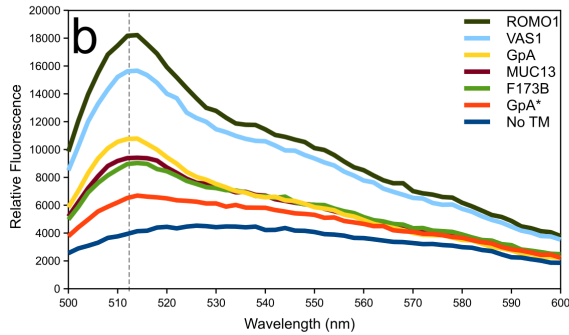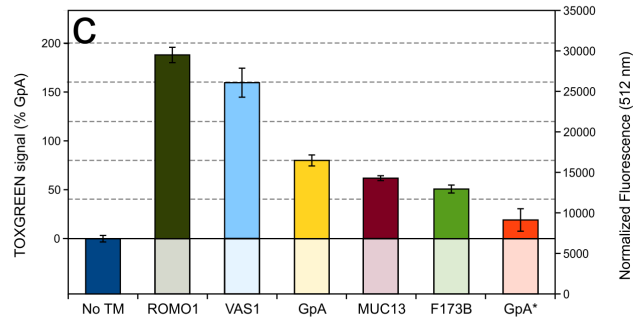

### Stationary Phase Cells Resuspended in PBS

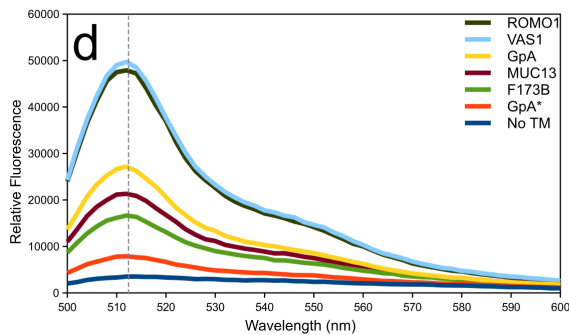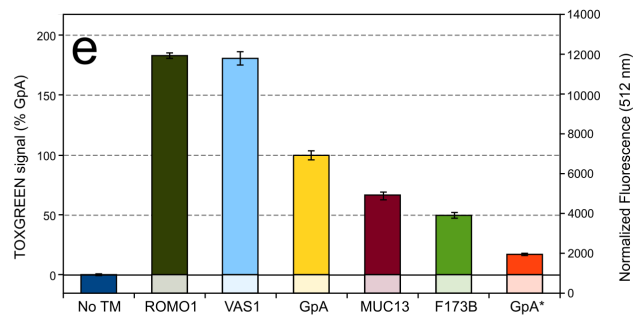

**Figure S1. Fluorescence emission scans and TOXGREEN signal calculation in different cell growth conditions.** Fluorescence measurements of seven TOXGREEN constructs, including the “no-TM” control, as in Fig. 2. The dashed vertical line indicates the readout wavelength used (512 nm). a) Fluorescence spectra of cells in log phase measured directly in LB culture media. No fluorescent signal is apparent. b) Fluorescence spectra of the same log phase cells harvested by centrifugation and resuspended in the same volume of PBS buffer. c) Conversion of the log phase cell’s fluorescence in PBS at 512 nm to TOXGREEN signal. d) Spectra of stationary phase cells, harvested by centrifugation and resuspended in the same volume of PBS buffer. Compared to the same cells in LB culture media (Fig. 2c) the background fluorescence (no-TM construct) is noticeably lower. e) Conversion of stationary phase cell’s fluorescence to TOXGREEN signal.

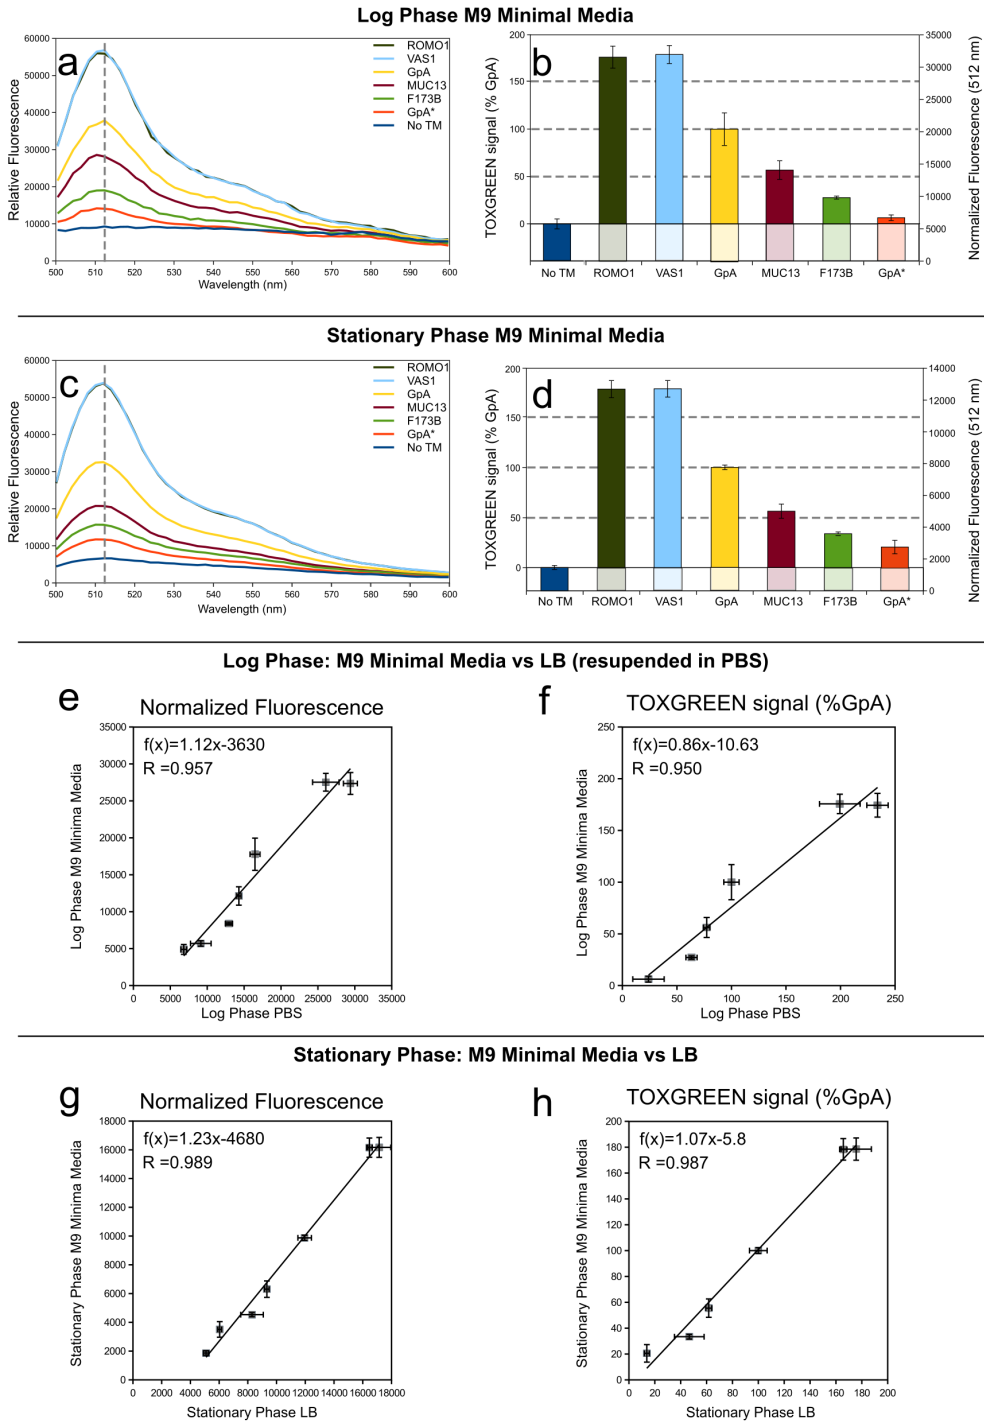

**Figure S2. Direct measurements in M9 minimal media in log and stationary phases.** a) Fluorescence spectra of cells in log phase grown in M9 minimal media. b) Conversion of log phase cell's fluorescence at 512 nm to TOXGREEN signal. c) Spectra of stationary phase cells grown in M9 minimal media. d) Conversion of stationary phase cell's fluorescence to TOXGREEN signal. e) Comparison of fluorescence of log phase cells grown in M9 minimal media and log phase cells in resuspended in 1X PBS buffer after normalization to cell density. f) Comparison of relative TOXGREEN signal for log phase grown in M9 minimal and log phase cells in 1X PBS buffer. g) Comparison of fluorescence of stationary phase cells grown in M9 minimal media and stationary phase cells in LB after normalization to cell density. h) Comparison of relative TOXGREEN signal for stationary phase grown in M9 minimal and stationary phase cells in LB.

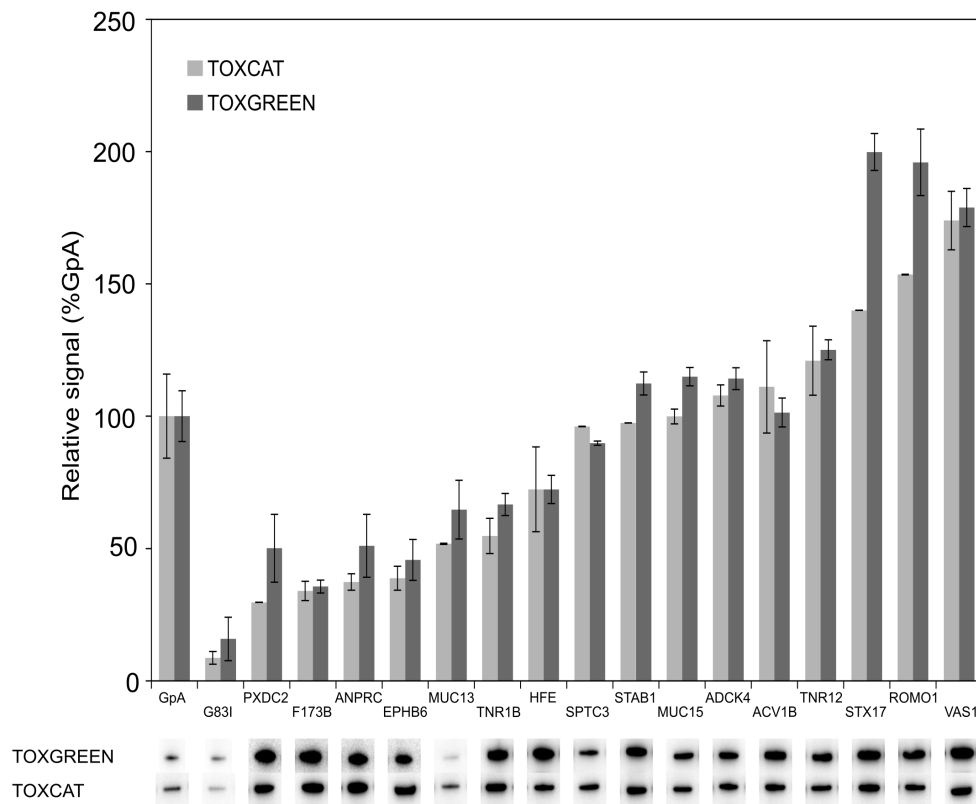

**Figure S3. TOXGREEN and TOXCAT are in excellent agreement.** Histogram representation of the data reported as XY plot in Fig. 3. Comparison of reporter gene expression between TOXCAT (measured as CAT enzymatic activity in lysates) and TOXGREEN (measured as fluorescence intensity whole cells in stationary phase). The values have been normalized to their respective value of the GpA sample (100%). The expression level of the TOXGREEN and TOXCAT chimeric constructs was assessed by immunoblotting using anti-MBP antibodies (bands displayed under the histogram). Constructs containing the same transmembrane sequence have a similar level of expression in the two assays.

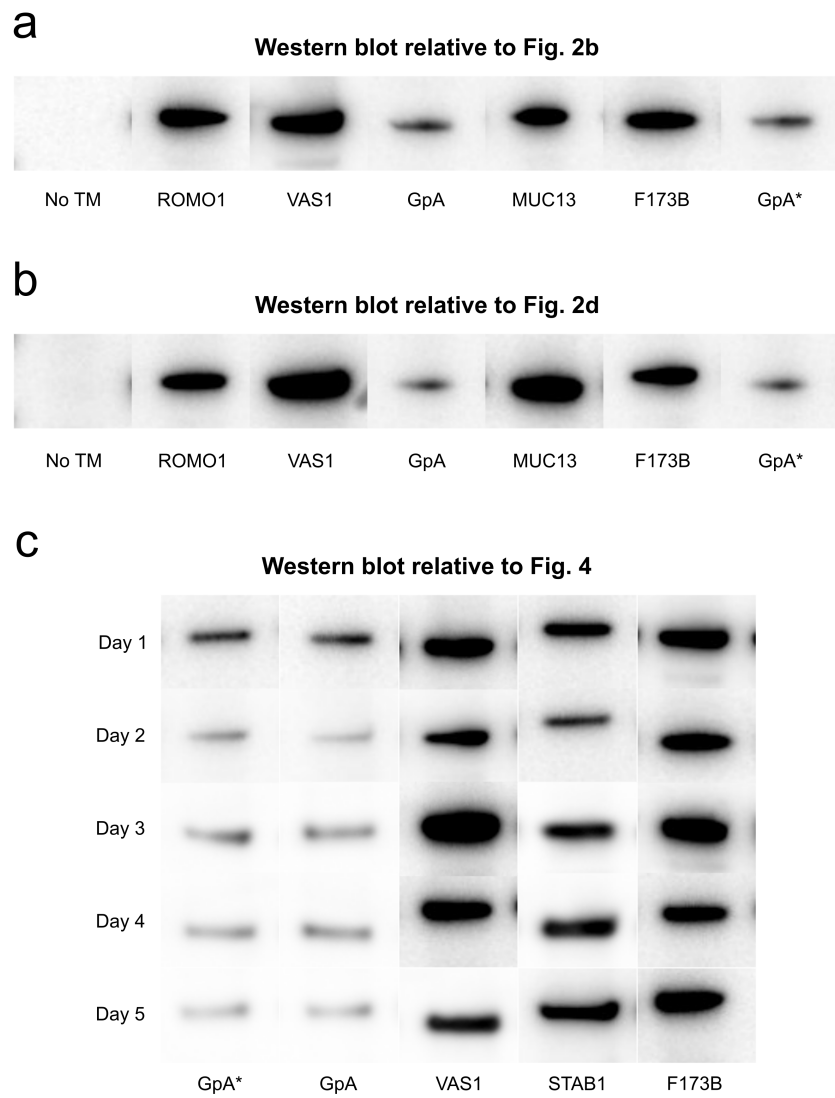

**Figure S4. Western blots of log and stationary phase cell cultures (Fig. 2) and of multi-day variability tests (Fig. 4).** Immunoblotting using anti-MBP antibodies to control for the expression level of the chimeras for the seven constructs used for TOXGREEN testing. a) Immunoblots of log phase cells concentrated in 3× PBS. b) Immunoblots of stationary phase cells in LB. c) Immunoblots of stationary phase cells in LB, taken over 5 days.

## References

- [1] B.K. Mueller, S.M. Anderson, S. Subramaniam, E. Lange, A. Senes, in preparation (2016).
- [2] UniProt Consortium, UniProt: a hub for protein information, *Nucleic Acids Res.*, 43 (2015) D204-212.
